# Supplementary material for: Targeting of FSP1 regulates iron homeostasis in drug-tolerant persister head and neck cancer cells via lipid-metabolism-driven ferroptosis
Source: publisher site journal article supplement (doi:10.18632/aging.205409), 2024-01-10
Supplement: Supplementary file [file aging-v16i1-205409-supplementary-material-SD1.pdf]

SUPPLEMENTARY FIGURE

Created with SnapGene®

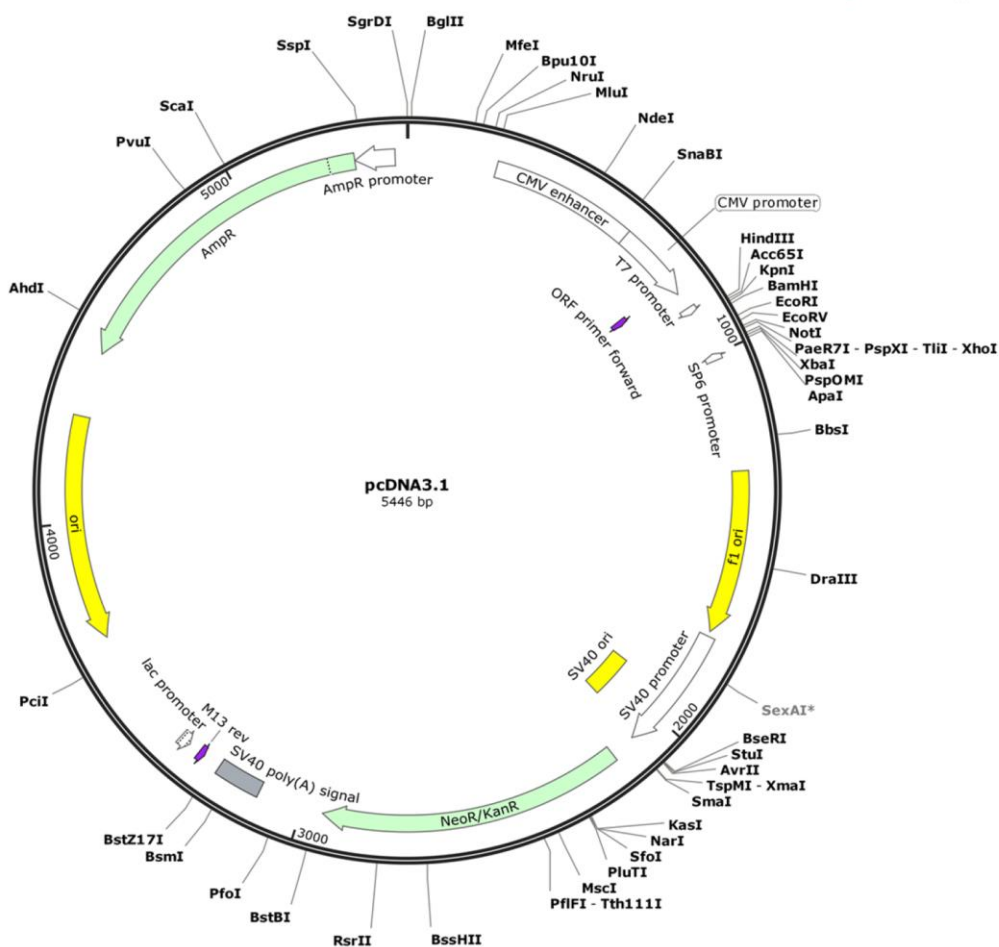

| Primer             | Sequence                       |
|--------------------|--------------------------------|
| FSP1-ECOR1-forward | AATTGAATTCTCTTGGTCTGGTCTCAACGG |
| FSP1-Xba1-reversed | AATTCTAGATGTCACCCTCTTTGCCTGAG  |

Supplementary Figure 1. Overexpression of FSP1 plasmid backbone and primer design.
