# Supplementary material for: Targeting of FSP1 regulates iron homeostasis in drug-tolerant persister head and neck cancer cells via lipid-metabolism-driven ferroptosis
Source: publisher site journal article supplement (doi:10.18632/aging.205409), 2024-01-10
Supplement: Supplementary file [file aging-v16i1-205409-supplementary-material-SD2.pdf]

## SUPPLEMENTARY TABLES

Supplementary Table 1. Q-PCR primer list.

| Primer | Forward                | Reverse                |
|--------|------------------------|------------------------|
| FSP1   | TCTTGGTCTGGTCTCAACGG   | TGTCACCCTCTTTGCCTGAG   |
| GPX4   | ACAAGAACGGCTGCGTGGTGAA | GCCACACACTTGTGGAGCTAGA |
| ACSL4  | TGGAAGTCCATATCGCTCTGT  | TTGGCTACAGCATGGTCAAA   |
| SOD2   | CTGGACAAACCTCAGCCCTAAC | AACCTGAGCCTTGGACACCAAC |
| GAPDH  | GTCTCCTCTGACTTCAACAGCG | ACCACCCTGTTGCTGTAGCCAA |

Supplementary Table 2. Antibody list.

| Antibody           | Catalog number | Source        |
|--------------------|----------------|---------------|
| AIFM2/FSP1 mAb     | #24972         | Cellsignaling |
| Anti-IREB2 mAb     | ab232994       | Abcam         |
| Anti-FBXL5 mAb     | ab140175       | Abcam         |
| GPX4 mAb           | #52455         | Cellsignaling |
| ACSL4 mAb (F-4)    | sc-365230      | Santa Cruz    |
| SOD2 (D9V9C) mAb   | #13194         | Cellsignaling |
| OCT 4 mAb          | ab137427       | Abcam         |
| Snail mAb          | ab216347       | Abcam         |
| Twist mAb          | ab50887        | Abcam         |
| $\beta$ -Actin mAb | #4967          | Cellsignaling |
